# Supplementary material
Source: Springer Nature journal article supplement (https://www.springermedizin.de/resource/supplementary/12889_2012_4549_MOESM1_ESM.pdf/9492186)

# GIRLS

**INTERVENTION (n=43)**

**CONTROL (n=41)**

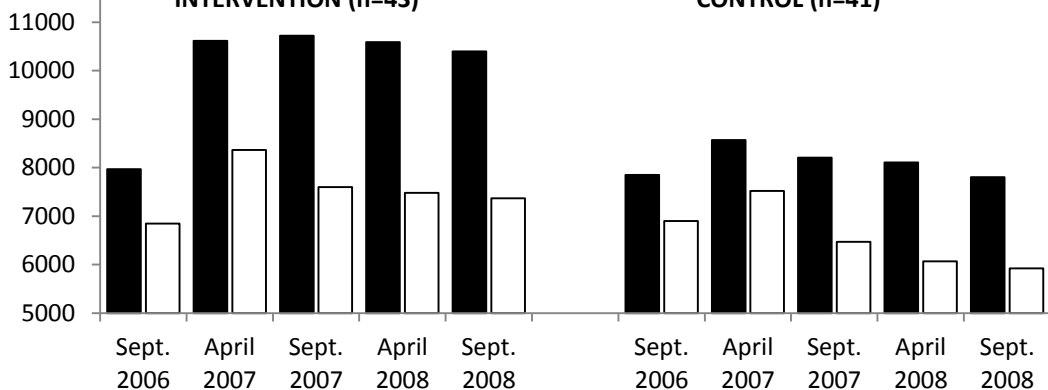

# BOYS

**INTERVENTION (n=45)**

**CONTROL (n=47)**

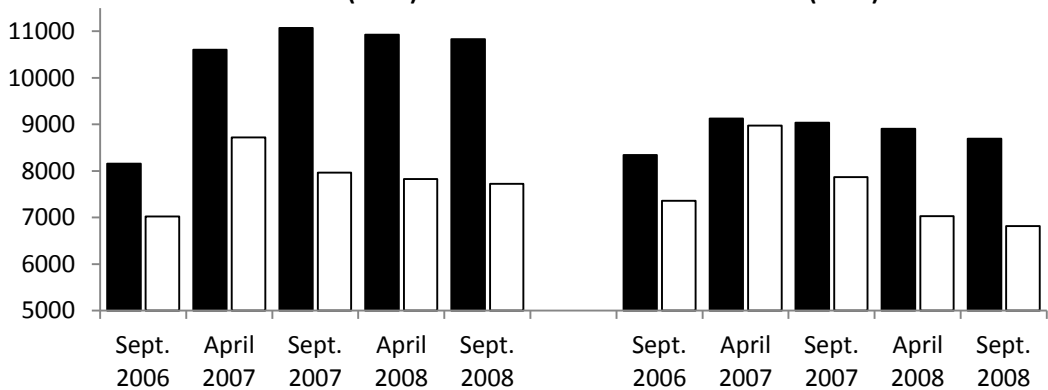

Supplement: MOESM1 [file 9492186]
